# Supplementary material for: Effect of HDI-Modified GO on the Thermoelectric Performance of Poly(3,4-ethylenedioxythiophene):Poly(Styrenesulfonate) Nanocomposite Films
Source: MDPI journal article supplement (doi:10.3390/polym13091503), 2021-05-07
Supplement: s1 [file s1]

## Supplementary Materials

### Effect of HDI-modified GO on the thermoelectric performance of poly(3,4-ethylenedioxythiophene):poly(styrenesulfonate) nanocomposite films

José A. Luceño-Sánchez <sup>1</sup>, Ana Charas <sup>2</sup> and Ana M. Díez-Pascual <sup>1,\*</sup>

<sup>1</sup> Universidad de Alcalá, Facultad de Ciencias, Departamento de Química Analítica, Química Física e Ingeniería Química, Ctra. Madrid-Barcelona, Km. 33.6, 28805 Alcalá de Henares, Madrid, España (Spain); jose.luceno@uah.es

<sup>2</sup> Instituto de Telecomunicações, Instituto Superior Técnico, Av. Rovisco Pais, P-1049-001 Lisbon, Portugal; ana.charas@lx.it.pt

\* Correspondence: am.diez@uah.es; Tel.: +34-918-856-430

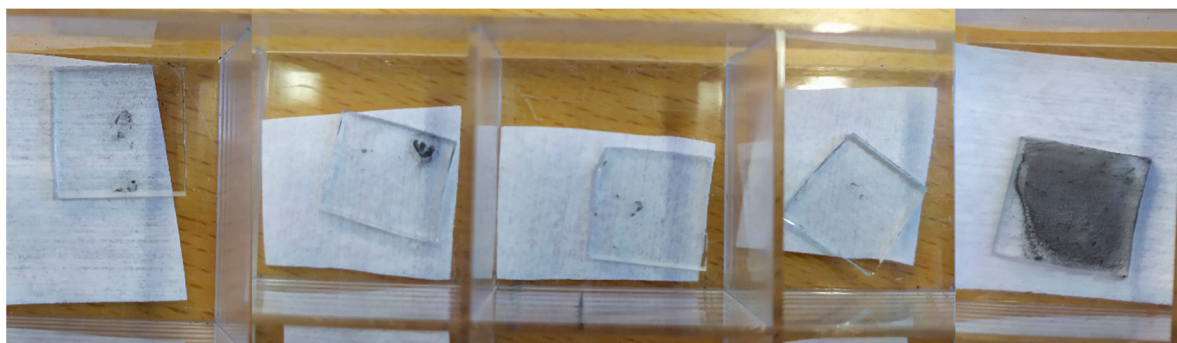

**Figure S1.** Spin coating samples of HDI-GO 5 in DMSO (10 wt%) (from left to right): spin-coated at 1000 rpm, substrate without ozone treatment; spin-coated at 1000 rpm, substrate with ozone treatment; spin-coated at 1800 rpm, substrate without ozone treatment; spin-coated at 1800 rpm, substrate with ozone treatment. For comparison, the drop-casted reference sample is shown in the last photo.

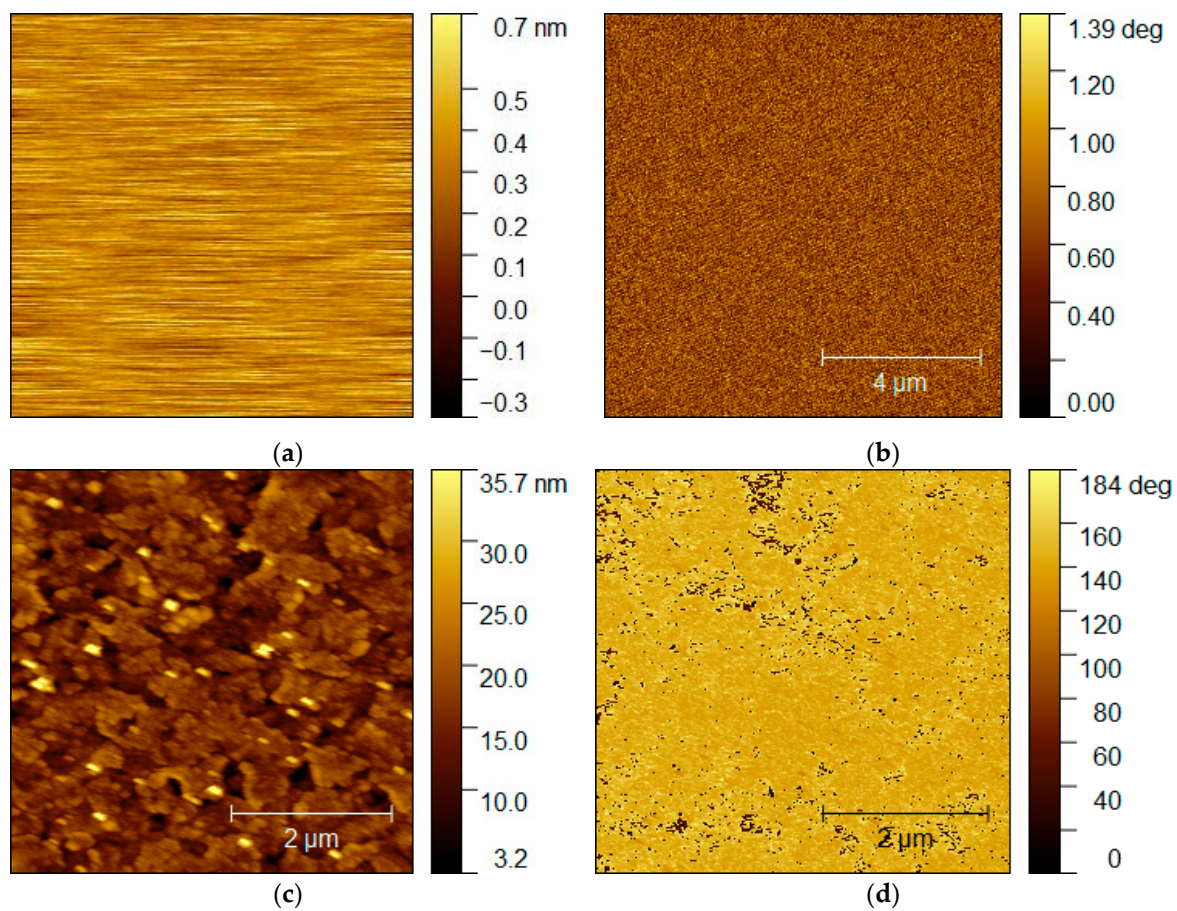

**Figure S2.** AFM images of the substrate reference samples: (a) glass 10x10  $\mu\text{m}$  topography image; (b) glass 10x10  $\mu\text{m}$  phase image; (c) glass/ITO 5x5  $\mu\text{m}$  topography image; (d) glass/ITO 5x5  $\mu\text{m}$  phase image.

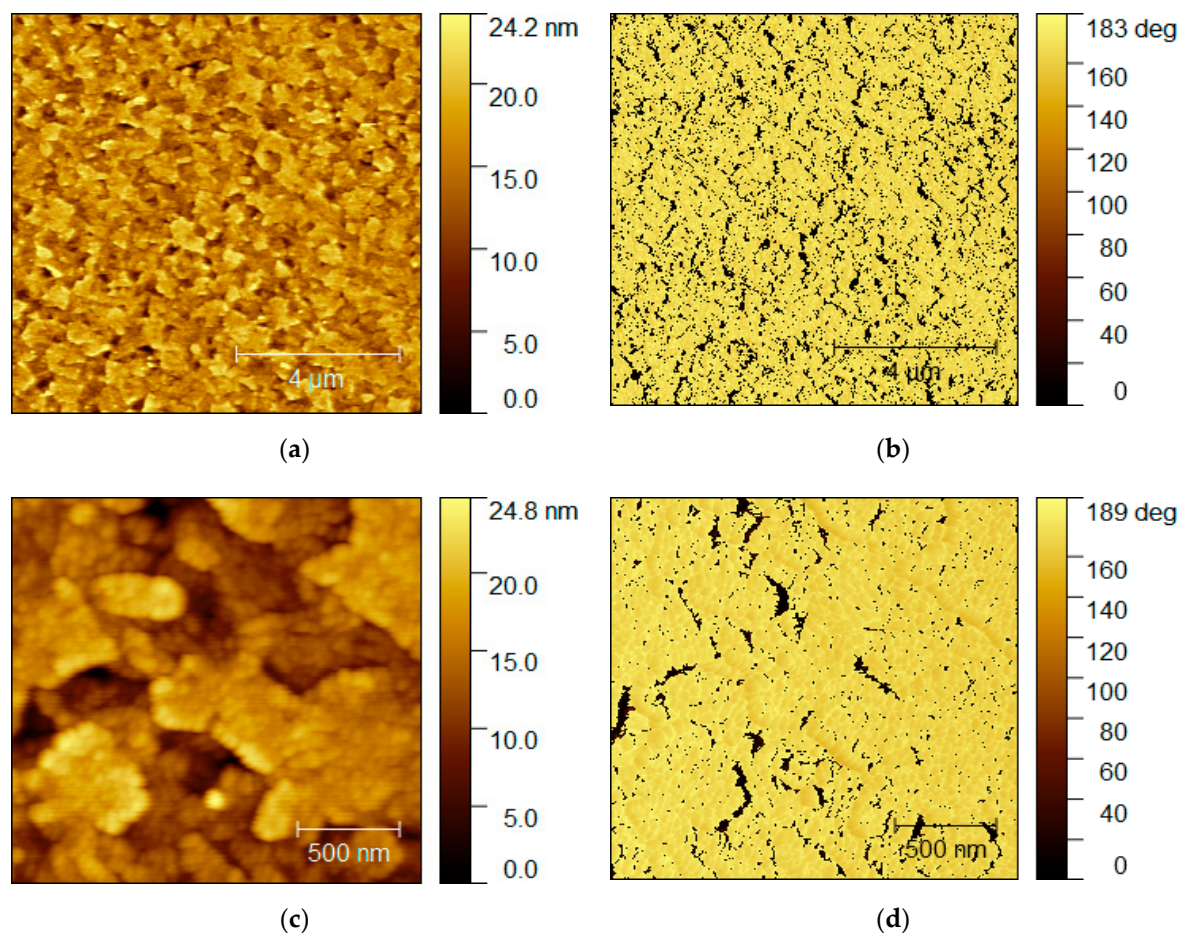

**Figure S3.** AFM images of HDI-GO5 spin coated at 1000 rpm over glass/ITO treated with ozone plasma and using DMSO as the solvent, at different magnifications: **(a and c)** topography images; **(b and d)** phase images.



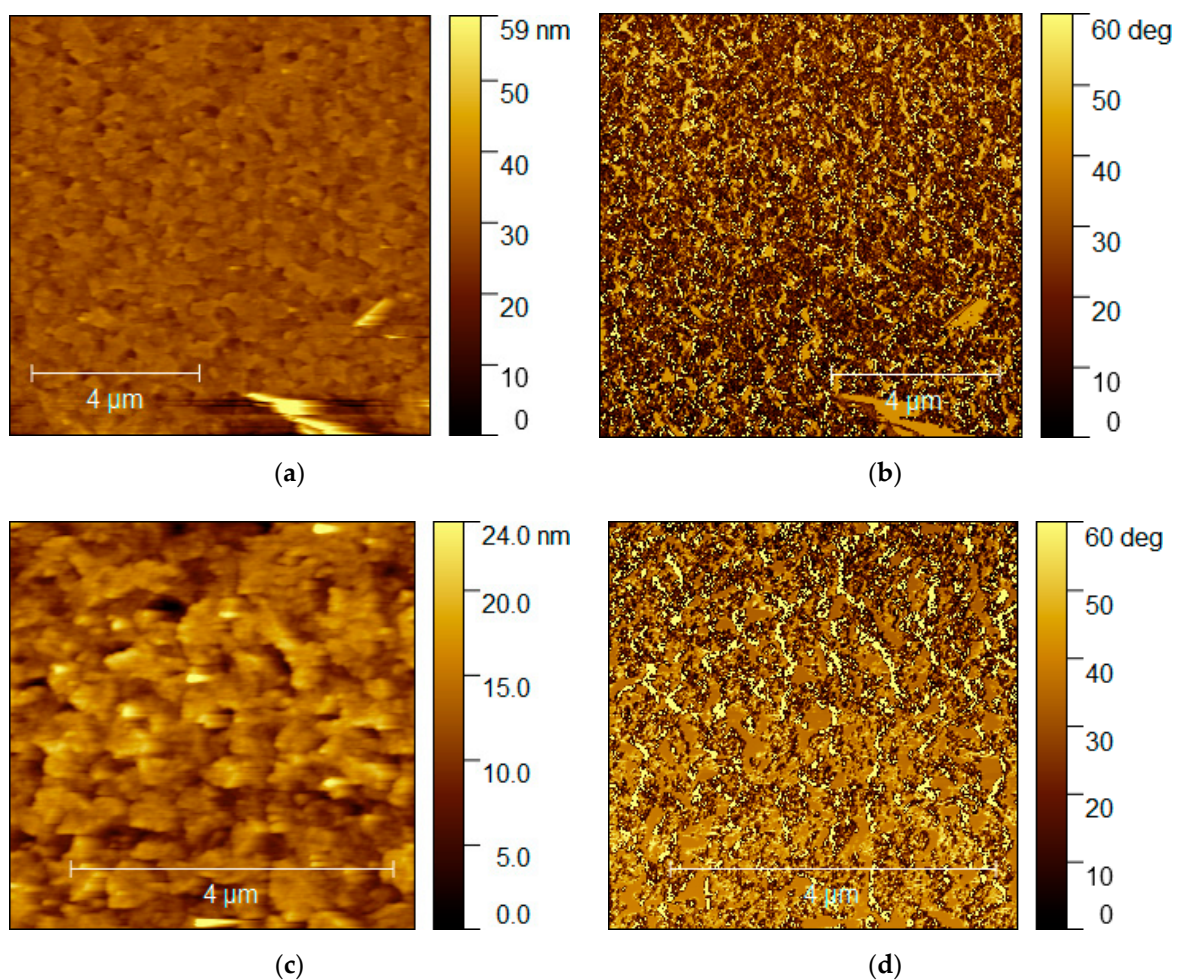

**Figure S4.** AFM images of HDI-GO 5 spin coated at 1000 rpm over glass/ITO treated with ozone plasma treatment and using IPA as the solvent: (a) 10x10  $\mu\text{m}$  topography images; (b) 10x10  $\mu\text{m}$  phase images; (c) 5x5  $\mu\text{m}$  topography images; (d) 5x5  $\mu\text{m}$  phase images.

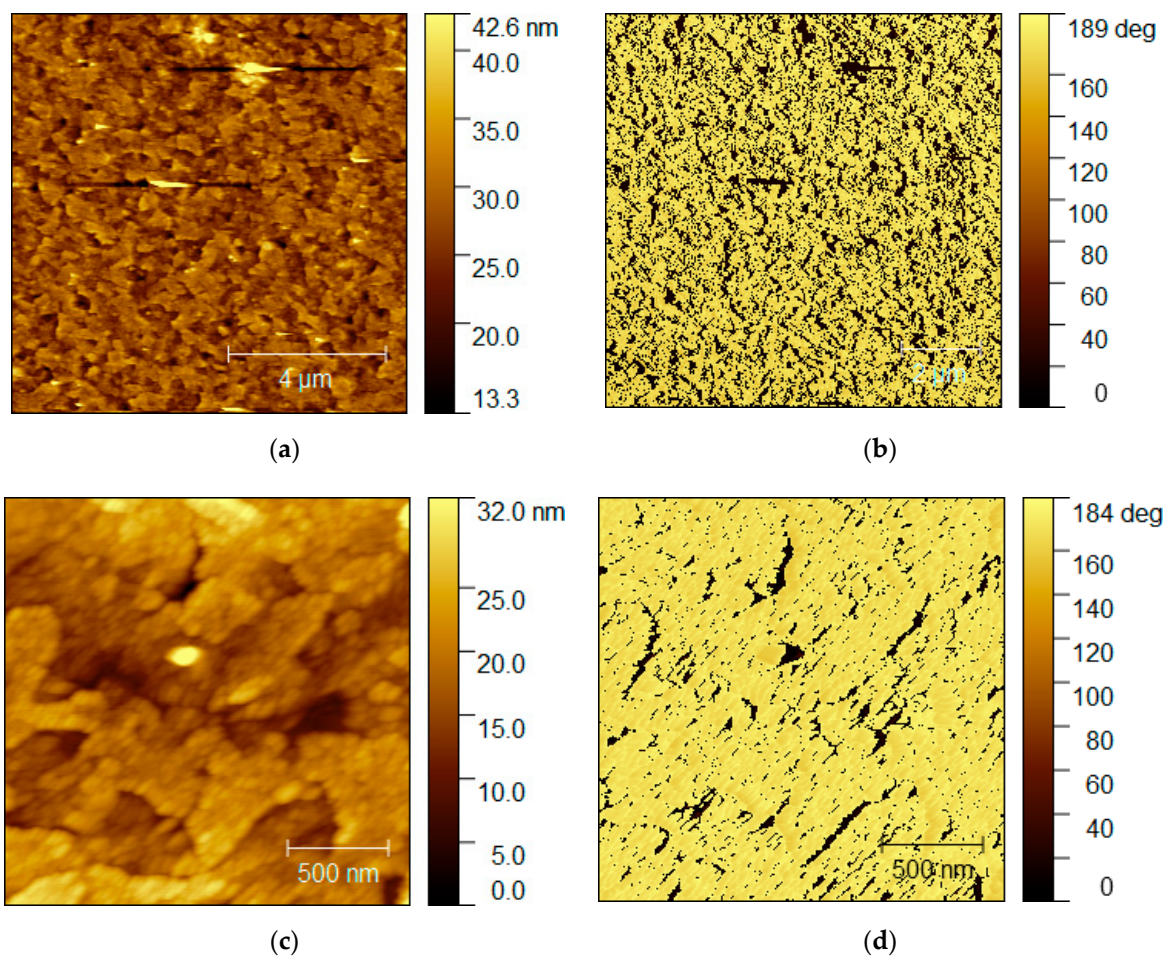

**Figure S5.** AFM images of HDI-GO 5 sample spin coated at 1000 rpm over glass/ITO substrates without plasma treatment and using IPA as solvent: (a) 10x10  $\mu\text{m}$  topography micrograph; (b) 10x10  $\mu\text{m}$  phase micrograph; (c) 5x5  $\mu\text{m}$  topography micrograph; (d) 2x2  $\mu\text{m}$  phase micrograph.
